# Supplementary material
Source: PubMed Central journal article supplement (PMC3656719)
Supplement: NIHMS409291-supplement-supplement_1.pdf [file NIHMS409291-supplement-supplement_1.pdf]

## **SUPPLEMENTAL MATERIAL**

**Supplemental Table 1A: Baseline characteristics, by quartile of soluble ST2**

| <b>Characteristic</b>                      | <b>Quartile 1<br/>(N=857)</b> | <b>Quartile 2<br/>(N=856)</b> | <b>Quartile 3<br/>(N=858)</b> | <b>Quartile 4<br/>(N=857)</b> |
|--------------------------------------------|-------------------------------|-------------------------------|-------------------------------|-------------------------------|
| <b>Soluble ST2 range, ng/mL</b>            |                               |                               |                               |                               |
| <b>Men</b>                                 | 5.78-19.20                    | 19.21-23.58                   | 23.59-29.07                   | 29.08-119.55                  |
| <b>Women</b>                               | 3.16-15.27                    | 15.28-18.77                   | 18.78-23.15                   | 23.16-86.89                   |
| <b>Age, years</b>                          | 57 ± 9                        | 59 ± 10                       | 60 ± 10                       | 61 ± 10                       |
| <b>Women, %</b>                            | 53                            | 53                            | 53                            | 53                            |
| <b>Body-mass index, kg/m<sup>2</sup></b>   | 27.5 ± 4.7                    | 27.6 ± 4.7                    | 28.0 ± 5.3                    | 28.5 ± 5.8                    |
| <b>Systolic blood pressure, mm Hg</b>      | 126 ± 18                      | 128 ± 18                      | 128 ± 19                      | 131 ± 20                      |
| <b>Use of anti-hypertensive therapy, %</b> | 21                            | 27                            | 28                            | 35                            |
| <b>Diabetes, %</b>                         | 7                             | 9                             | 12                            | 19                            |
| <b>Cigarette smoking, %</b>                | 16                            | 17                            | 14                            | 14                            |
| <b>Total cholesterol, mg/dl</b>            | 207 ± 36                      | 203 ± 36                      | 207 ± 40                      | 207 ± 48                      |
| <b>HDL cholesterol, mg/dl</b>              | 52 ± 16                       | 51 ± 17                       | 51 ± 15                       | 50 ± 17                       |
| <b>Atrial fibrillation, %</b>              | 2                             | 3                             | 3                             | 4                             |
| <b>Prevalent CVD, %</b>                    | 5                             | 5                             | 5                             | 6                             |
| <b>ECG LVH, %</b>                          | 0.2                           | 0.8                           | 0.9                           | 0.6                           |
| <b>Significant murmur, %</b>               | 2                             | 3                             | 3                             | 3                             |

HDL: high density lipoprotein; CVD: cardiovascular disease; ECG: electrocardiography; LVH: left ventricular hypertrophy. For continuous variables, values are mean ± SD or medians (Q1 to Q3).

**Supplemental Table 1B: Baseline characteristics, by quartile of Growth Differentiation Factor-15**

| <b>Characteristic</b>                      | <b>Quartile 1<br/>(N=857)</b> | <b>Quartile 2<br/>(N=857)</b> | <b>Quartile 3<br/>(N=858)</b> | <b>Quartile 4<br/>(N=856)</b> |
|--------------------------------------------|-------------------------------|-------------------------------|-------------------------------|-------------------------------|
| <b>GDF-15 range, ng/L</b>                  |                               |                               |                               |                               |
| <b>Men</b>                                 | 306 – 820                     | 821 – 1065                    | 1066 – 1414                   | 1415 – 14493                  |
| <b>Women</b>                               | 308 – 811                     | 812 – 1021                    | 1022 – 1304                   | 1305 – 16074                  |
| <b>Age, years</b>                          | 51 ± 7                        | 57 ± 8                        | 62 ± 9                        | 66 ± 8                        |
| <b>Women, %</b>                            | 53                            | 53                            | 53                            | 53                            |
| <b>Body-mass index, kg/m<sup>2</sup></b>   | 27.6 ± 4.9                    | 27.7 ± 5.3                    | 28.0 ± 5.0                    | 28.3 ± 5.3                    |
| <b>Systolic blood pressure, mm Hg</b>      | 122 ± 17                      | 127 ± 18                      | 131 ± 18                      | 134 ± 20                      |
| <b>Use of anti-hypertensive therapy, %</b> | 15                            | 21                            | 32                            | 43                            |
| <b>Diabetes, %</b>                         | 6                             | 6                             | 12                            | 23                            |
| <b>Cigarette smoking, %</b>                | 9                             | 15                            | 18                            | 20                            |
| <b>Total cholesterol, mg/dL</b>            | 204 ± 37                      | 208 ± 37                      | 207 ± 39                      | 204 ± 48                      |
| <b>HDL cholesterol, mg/dL</b>              | 52 ± 15                       | 53 ± 17                       | 51 ± 16                       | 49 ± 16                       |
| <b>Atrial fibrillation, %</b>              | 0.4                           | 2                             | 3                             | 7                             |
| <b>Prevalent CVD, %</b>                    | 2                             | 2                             | 6                             | 12                            |
| <b>ECG LVH, %</b>                          | 0.1                           | 0.5                           | 0.6                           | 1                             |
| <b>Significant murmur, %</b>               | 1                             | 3                             | 3                             | 5                             |

HDL: high density lipoprotein; CVD: cardiovascular disease; ECG: electrocardiography; LVH: left ventricular hypertrophy. For continuous variables, values are mean ± SD or medians (Q1 to Q3).

**Supplemental Table 1C: Baseline characteristics, by quartile of high-sensitivity troponin I**

| <b>Characteristic</b>                      | <b>Quartile 1<br/>(N=878)</b> | <b>Quartile 2<br/>(N=832)</b> | <b>Quartile 3<br/>(N=862)</b> | <b>Quartile 4<br/>(N=856)</b> |
|--------------------------------------------|-------------------------------|-------------------------------|-------------------------------|-------------------------------|
| <b>hsTnI range, pg/mL</b>                  |                               |                               |                               |                               |
| <b>Men</b>                                 | nd – 1.05                     | 1.06 – 1.63                   | 1.64 – 2.64                   | 2.65 – 249.86                 |
| <b>Women</b>                               | nd – 0.78                     | 0.79 – 1.14                   | 1.15 – 1.90                   | 1.91 – 578.27                 |
| <b>Age, years</b>                          | 55 ± 8                        | 58 ± 9                        | 61 ± 9                        | 62 ± 10                       |
| <b>Women, %</b>                            | 54                            | 51                            | 54                            | 53                            |
| <b>Body-mass index, kg/m<sup>2</sup></b>   | 27.3 ± 4.8                    | 28.2 ± 5.4                    | 28.1 ± 5.0                    | 28.0 ± 5.3                    |
| <b>Systolic blood pressure, mm Hg</b>      | 124 ± 17                      | 128 ± 17                      | 130 ± 19                      | 132 ± 21                      |
| <b>Use of anti-hypertensive therapy, %</b> | 16                            | 27                            | 32                            | 37                            |
| <b>Diabetes, %</b>                         | 7                             | 11                            | 10                            | 18                            |
| <b>Cigarette smoking, %</b>                | 19                            | 16                            | 13                            | 13                            |
| <b>Total cholesterol, mg/dL</b>            | 207 ± 42                      | 205 ± 38                      | 207 ± 39                      | 205 ± 42                      |
| <b>HDL cholesterol, mg/dL</b>              | 52 ± 16                       | 51 ± 16                       | 52 ± 16                       | 50 ± 17                       |
| <b>Atrial fibrillation, %</b>              | 1                             | 2                             | 3                             | 6                             |
| <b>Prevalent CVD, %</b>                    | 2                             | 2                             | 7                             | 10                            |
| <b>ECG LVH, %</b>                          | 0.2                           | 0.1                           | 0.2                           | 2                             |
| <b>Significant murmur, %</b>               | 1                             | 2                             | 2                             | 6                             |

HDL: high density lipoprotein; CVD: cardiovascular disease; ECG: electrocardiography; LVH: left ventricular hypertrophy; nd: non-detectable. For continuous variables, values are mean ± SD or medians (Q1 to Q3).

**Supplemental Table 2: Relation of new cardiovascular biomarkers with death and cardiovascular events in quartile models**

|                                | <b>Death</b>     | <b>Heart failure</b> | <b>Major cardiovascular events</b> |
|--------------------------------|------------------|----------------------|------------------------------------|
| <b><i>sST2</i></b>             |                  |                      |                                    |
| <b>1<sup>st</sup> quartile</b> | Referent         | Referent             | Referent                           |
| <b>2<sup>nd</sup> quartile</b> | 1.06 (0.79-1.42) | 1.10 (0.60-2.01)     | 0.96 (0.67-1.38)                   |
| <b>3<sup>rd</sup> quartile</b> | 1.27 (0.96-1.69) | 1.98 (1.13-3.45)     | 1.50 (1.07-2.10)                   |
| <b>4<sup>th</sup> quartile</b> | 1.74 (1.33-2.27) | 2.48 (1.45-4.23)     | 1.67 (1.20-2.31)                   |
| <b>P for trend</b>             | <0.001           | <0.001               | <0.001                             |
| <b><i>GDF-15</i></b>           |                  |                      |                                    |
| <b>1<sup>st</sup> quartile</b> | Referent         | Referent             | Referent                           |
| <b>2<sup>nd</sup> quartile</b> | 1.52 (0.94-2.47) | 0.97 (0.40-2.36)     | 0.82 (0.53-1.28)                   |
| <b>3<sup>rd</sup> quartile</b> | 2.22 (1.40-3.52) | 1.84 (0.83-4.07)     | 1.39 (0.93-2.08)                   |
| <b>4<sup>th</sup> quartile</b> | 3.70 (2.34-5.86) | 3.04 (1.38-6.71)     | 1.56 (1.03-2.36)                   |
| <b>P for trend</b>             | <0.001           | <0.001               | 0.002                              |
| <b><i>HsTnI</i></b>            |                  |                      |                                    |
| <b>1<sup>st</sup> quartile</b> | Referent         | Referent             | Referent                           |
| <b>2<sup>nd</sup> quartile</b> | 0.95 (0.69-1.30) | 1.48 (0.74-2.97)     | 0.78 (0.54-1.13)                   |
| <b>3<sup>rd</sup> quartile</b> | 1.05 (0.78-1.42) | 1.41 (0.71-2.78)     | 0.95 (0.67-1.35)                   |
| <b>4<sup>th</sup> quartile</b> | 1.29 (0.97-1.73) | 2.96 (1.57-5.56)     | 1.50 (1.08-2.08)                   |
| <b>P for trend</b>             | 0.03             | <0.001               | <0.001                             |

Values are hazards ratios (HR), with 95% confidence interval, from multivariable models adjusting for age, sex, body mass index, systolic blood pressure, hypertension therapy, diabetes, cigarette smoking, total cholesterol, HDL cholesterol, prevalent atrial fibrillation (heart failure and death analyses only), prevalent cardiovascular disease (heart failure and death analyses), electrocardiographic left ventricular hypertrophy (heart failure and death analyses), and heart murmur (heart failure analysis only).

**Supplemental Table 3: Exclusion of individuals with diabetes or left ventricular hypertrophy**

|                                | <b>Death</b>       |                                                   | <b>Heart Failure</b> |                                                   | <b>Major cardiovascular events</b> |                                                   |
|--------------------------------|--------------------|---------------------------------------------------|----------------------|---------------------------------------------------|------------------------------------|---------------------------------------------------|
|                                | <b>Full sample</b> | <b>Excluding individuals with diabetes or LVH</b> | <b>Full sample</b>   | <b>Excluding individuals with diabetes or LVH</b> | <b>Full sample</b>                 | <b>Excluding individuals with diabetes or LVH</b> |
| <b>Multimarker score</b>       |                    |                                                   |                      |                                                   |                                    |                                                   |
| <b>Per 1-unit</b>              | 1.80 (1.64-1.98)   | 1.71 (1.53-1.92)                                  | 1.83 (1.55-2.16)     | 1.70 (1.39-2.09)                                  | 1.43 (1.28-1.61)                   | 1.37 (1.20-1.57)                                  |
| <b>p-value</b>                 | <0.001             | <0.001                                            | <0.001               | <0.001                                            | <0.001                             | <0.001                                            |
| <b>By quartile</b>             |                    |                                                   |                      |                                                   |                                    |                                                   |
| <b>1<sup>st</sup> quartile</b> | Referent           | Referent                                          | Referent             | Referent                                          | Referent                           | Referent                                          |
| <b>2<sup>nd</sup> quartile</b> | 1.26 (0.82-1.92)   | 0.92 (0.57-1.52)                                  | 1.52 (0.57-4.06)     | 3.03 (0.86-10.69)                                 | 1.01 (0.67-1.53)                   | 1.22 (0.78-1.93)                                  |
| <b>3<sup>rd</sup> quartile</b> | 1.55 (1.04-2.30)   | 1.65 (1.07-2.54)                                  | 2.19 (0.88-5.42)     | 2.54 (0.72-9.96)                                  | 1.10 (0.74-1.63)                   | 1.03 (0.65-1.62)                                  |
| <b>4<sup>th</sup> quartile</b> | 3.20 (2.18-4.70)   | 2.68 (1.75-4.11)                                  | 6.25 (2.63-14.82)    | 7.49 (2.25-24.87)                                 | 1.87 (1.28-2.73)                   | 1.85 (1.21-2.83)                                  |
| <b>P for trend</b>             | <0.001             | <0.001                                            | <0.001               | <0.001                                            | <0.001                             | 0.001                                             |

Values shown are multivariable-adjusted hazard ratios, with 95% confidence interval. All models adjust for age, sex, body mass index, systolic blood pressure, hypertension therapy, diabetes, cigarette smoking, total cholesterol, HDL cholesterol, prevalent atrial fibrillation (heart failure and death analyses), electrocardiographic left ventricular hypertrophy (heart failure and death analyses), and heart murmur (heart failure analysis). LVH: electrocardiographic left ventricular hypertrophy.

#### Supplemental Table 4: Reclassification table for death

##### Individuals who develop an event during the first 10 years of follow up

| Clinical covariates | Model with clinical covariates and biomarker score |             |      |       |
|---------------------|----------------------------------------------------|-------------|------|-------|
|                     | <10%                                               | 10% to <20% | ≥20% | Total |
| <10%                | 69                                                 | 12          | 6    | 87    |
| 10% to <20%         | 18                                                 | 49          | 24   | 91    |
| ≥20%                | 0                                                  | 17          | 146  | 163   |
| Total               | 87                                                 | 78          | 176  | 341   |

##### Individuals who do not have an event during the first 10 years of follow up

| Clinical covariates | Model with clinical covariates and biomarker score |             |      |       |
|---------------------|----------------------------------------------------|-------------|------|-------|
|                     | <10%                                               | 10% to <20% | ≥20% | Total |
| <10%                | 1961                                               | 77          | 10   | 2048  |
| 10% to <20%         | 186                                                | 288         | 69   | 543   |
| ≥20%                | 11                                                 | 87          | 222  | 320   |
| Total               | 2158                                               | 452         | 301  | 2911  |

The number of events differs from the main analyses, because the table is restricted to events occurring during the first 10 years of follow up. Percentages in row and column headers denote predicted 10-year risk of events.

**Supplemental Table 5: Reclassification table for heart failure**

**Individuals who develop an event during the first 10 years of follow up**

| Clinical covariates | Model with clinical covariates and biomarker score |           |     |       |
|---------------------|----------------------------------------------------|-----------|-----|-------|
|                     | <3%                                                | 3% to <8% | ≥8% | Total |
| <3%                 | 14                                                 | 7         | 1   | 22    |
| 3% to <8%           | 1                                                  | 22        | 7   | 30    |
| ≥8%                 | 0                                                  | 4         | 62  | 66    |
| <b>Total</b>        | 15                                                 | 33        | 70  | 118   |

**Individuals who do not have an event during the first 10 years of follow up**

| Clinical covariates | Model with clinical covariates and biomarker score |           |     |       |
|---------------------|----------------------------------------------------|-----------|-----|-------|
|                     | <3%                                                | 3% to <8% | ≥8% | Total |
| <3%                 | 2017                                               | 102       | 7   | 2126  |
| 3% to <8%           | 216                                                | 349       | 72  | 637   |
| ≥8%                 | 6                                                  | 101       | 224 | 331   |
| <b>Total</b>        | 2239                                               | 552       | 303 | 3094  |

The number of events differs from the main analyses, because the table is restricted to events occurring during the first 10 years of follow up. Percentages in row and column headers denote predicted 10-year risk of events.



**Supplemental Table 6: Reclassification table for first major cardiovascular events**

**Individuals who develop an event during the first 10 years of follow up**

| Clinical covariates | Model with clinical covariates and biomarker score |             |      |       |
|---------------------|----------------------------------------------------|-------------|------|-------|
|                     | <10%                                               | 10% to <20% | ≥20% | Total |
| <10%                | 68                                                 | 14          | 0    | 82    |
| 10% to <20%         | 9                                                  | 53          | 17   | 79    |
| ≥20%                | 0                                                  | 14          | 75   | 89    |
| <b>Total</b>        | 77                                                 | 81          | 92   | 250   |

**Individuals who do not have an event during the first 10 years of follow up**

| Clinical covariates | Model with clinical covariates and biomarker score |             |      |       |
|---------------------|----------------------------------------------------|-------------|------|-------|
|                     | <10%                                               | 10% to <20% | ≥20% | Total |
| <10%                | 2080                                               | 75          | 5    | 2160  |
| 10% to <20%         | 120                                                | 308         | 64   | 492   |
| ≥20%                | 1                                                  | 51          | 170  | 222   |
| <b>Total</b>        | 2201                                               | 434         | 239  | 2874  |

The number of events differs from the main analyses, because the table is restricted to events occurring during the first 10 years of follow up. Percentages in row and column headers denote predicted 10-year risk of events.

**Supplemental Table 7: Association of biomarkers with events in subsets of the sample**

| <b>Biomarkers</b> | <b>Death</b>                         |                                                       | <b>Heart Failure</b>                 |                                                       | <b>Major cardiovascular events</b>                    |
|-------------------|--------------------------------------|-------------------------------------------------------|--------------------------------------|-------------------------------------------------------|-------------------------------------------------------|
|                   | Adjusted for major and non-major CVD | Excluding anyone with baseline major or non-major CVD | Adjusted for major and non-major CVD | Excluding anyone with baseline major or non-major CVD | Excluding anyone with baseline major or non-major CVD |
| sST2              | 1.32 (1.20-1.45)                     | 1.32 (1.18-1.48)                                      | 1.40 (1.19-1.65)                     | 1.48 (1.20-1.83)                                      | 1.27 (1.12-1.44)                                      |
| GDF-15            | 1.65 (1.51-1.81)                     | 1.69 (1.51-1.88)                                      | 1.48 (1.26-1.74)                     | 1.64 (1.34-2.00)                                      | 1.19 (1.05-1.36)                                      |
| hsTnI             | 1.16 (1.07-1.26)                     | 1.11 (1.01-1.22)                                      | 1.27 (1.12-1.44)                     | 1.20 (1.03-1.39)                                      | 1.15 (1.04-1.27)                                      |

Values shown are multivariable-adjusted hazard ratios, with 95% confidence interval, per standard deviation increment in the biomarker. All models adjust for age, sex, body mass index, systolic blood pressure, hypertension therapy, diabetes, cigarette smoking, total cholesterol, HDL cholesterol, prevalent atrial fibrillation (heart failure and death analyses), electrocardiographic left ventricular hypertrophy (heart failure and death analyses), and heart murmur (heart failure analysis).
